# Supplementary material for: Digital health interventions for chronic diseases: a scoping review of evaluation frameworks
Source: PubMed Central journal article supplement — BMJ Health Care Inform. 2020 Mar 9;27(1):e100066. doi: 10.1136/bmjhci-2019-100066 (PMC7252973; doi:10.1136/bmjhci-2019-100066), 2020-03-09
Supplement: bmjhci-2019-100066supp001.pdf [file bmjhci-2019-100066supp001.pdf]

## Appendix 1: Search strategy for PubMed

|          |                                                                                                                                                                                                                                                                                                                                                                                                                                                                                                                                                                                                                                                                                                                                                                                                                                                                                                                                                                                                                                                                                                                                                                                                                                                                                                                                                                                                                                                                                                                                                                                                                                                                                                                                                                                                                                                                                                       |
|----------|-------------------------------------------------------------------------------------------------------------------------------------------------------------------------------------------------------------------------------------------------------------------------------------------------------------------------------------------------------------------------------------------------------------------------------------------------------------------------------------------------------------------------------------------------------------------------------------------------------------------------------------------------------------------------------------------------------------------------------------------------------------------------------------------------------------------------------------------------------------------------------------------------------------------------------------------------------------------------------------------------------------------------------------------------------------------------------------------------------------------------------------------------------------------------------------------------------------------------------------------------------------------------------------------------------------------------------------------------------------------------------------------------------------------------------------------------------------------------------------------------------------------------------------------------------------------------------------------------------------------------------------------------------------------------------------------------------------------------------------------------------------------------------------------------------------------------------------------------------------------------------------------------------|
| <b>1</b> | <p>("Telemedicine"[Mesh] OR "Mobile Applications"[Mesh] OR "Cellular Phone"[Mesh] OR "Computers, Handheld"[Mesh] OR "Smartphone"[Mesh] OR "Text Messaging"[Mesh]) OR ("cellphone" OR "cellphones" OR "cell phone" OR "cell phones" OR "cellular phone" OR "cellular phones" OR "mobile phone" OR "mobile phones" OR "mobile device" OR "mobile devices" OR "mobile-based" OR "mobile-based application" OR "mobile telephone" OR "mobile telephones" OR "smartphone" OR "smartphones" OR "smart phone" OR "smart phones" OR "iPhone" OR "android" OR "mhealth" OR "m-health" OR "mobile health" OR "Mobile Applications" OR "mobile app" OR "mobile apps" OR "mobile health app" OR "mobile health apps" OR "mobile phone app" OR "mobile phone apps" OR "mobile technology" OR "mobile technologies" OR "mobile telecommunication" OR "mobile telecommunications" OR "online health" OR "telehealth" OR "tele-health" OR "eHealth" OR "e-health" OR "electronic health" OR "text messaging" OR "web-based platform" OR "web-based platforms" OR "mobile health monitoring" OR "mHealth monitoring" OR "m-health monitoring" OR "web-based health monitoring" OR "Remote health monitoring" OR "home health monitoring" OR "web site" OR "telemedicine" OR "tele-medicine" OR "portable software app" OR "portable software apps" OR "portable software application" OR "portable software applications" OR "computer handheld" OR "palmtop computer" OR "palm-top computer" OR "Personal Digital Assistant" OR "PDA computer" OR "PDA computers" OR "Pocket PC" OR "Pocket PDs" OR "Tablet Computer" OR "Tablet Computers" OR "Palm Pilot" OR "Palm pilots")</p>                                                                                                                                                                                                                                     |
| <b>2</b> | <p>("Chronic Disease"[Mesh] OR "Overweight"[Mesh] OR "Obesity"[Mesh] OR "Pediatric Obesity"[Mesh] OR "Obesity, Abdominal"[Mesh] OR "Obesity Hypoventilation Syndrome"[Mesh] OR "Obesity, Morbid"[Mesh] OR "Obesity, Metabolically benign"[Mesh] OR "Rheumatic Heart Disease"[Mesh] OR "Stroke"[Mesh] OR "Ischemic Attack, Transient"[Mesh] OR "Anxiety Disorders"[Mesh] OR "Asthma"[Mesh] OR "Heart Failure"[Mesh] OR "Renal Insufficiency, Chronic"[Mesh] OR "Pulmonary Disease, Chronic Obstructive"[Mesh] OR "Coronary Heart Disease"[Mesh] OR "Dementia"[Mesh] OR "Dental Caries"[Mesh] OR "Depression"[Mesh] OR "Developmental Disabilities"[Mesh] OR "Diabetes Mellitus"[Mesh] OR "dyslipid"[Mesh] OR "Hepatitis B"[Mesh] OR "Hypertension"[Mesh] OR "Osteoporosis"[Mesh] OR "Osteoarthritis"[Mesh]) OR ("Chronic disease" OR "Chronic diseases" OR "chronic illness" OR "chronic illnesses" OR "chronically ill" OR "Obesity" OR "Overweight" OR "Stroke" OR "Ischemic Attack" OR "TIA" OR "Anxiety Disorder" OR "Anxiety Disorders" OR "Panic disorder" OR "PTSD" OR "Post Traumatic Stress Disorder" OR "GAD" OR "Generalised Anxiety Disorder" OR "Obsessive Compulsive Disorder" OR "OCD" OR "Social Anxiety Disorder" OR "Specific Phobia" OR "Asthma" OR "CHF" OR "Chronic Heart Failure" OR "coronary heart disease" OR "Chronic kidney disease" OR "CKD" OR "COPD" OR "Chronic Obstructive Pulmonary Disease" OR "Dementia" OR "Dental Caries" OR "Periodontal Disease" OR "Depression" OR "Dysthymia" OR "Psychotic depression" OR "Bipolar disorder" OR "Perinatal depression" OR "Developmental disabilities" OR "Developmental delay" OR "Diabetes" OR "Dyslipidaemia" OR "Hepatitis" OR "CHB" OR "Hypertension" OR "Osteoarthritis" OR "OA" OR "Osteoporosis" OR "Poor growth" OR "Developing chronic disease" OR "delayed cognitive" OR "Rheumatoid Heart Disease" OR "RHD")</p> |
| <b>3</b> | <p>("Models, Theoretical"[Mesh]) OR ("framework" OR "frameworks" OR "theoretical model" OR "theoretical models" OR "theoretic model" OR "theoretic models" OR "theoretical study" OR "theoretical studies" OR "implementation" OR "conceptual model" OR "conceptual models" OR "road map" OR "Roadmap")</p>                                                                                                                                                                                                                                                                                                                                                                                                                                                                                                                                                                                                                                                                                                                                                                                                                                                                                                                                                                                                                                                                                                                                                                                                                                                                                                                                                                                                                                                                                                                                                                                           |
| <b>4</b> | <p>1 AND 2 AND 3</p>                                                                                                                                                                                                                                                                                                                                                                                                                                                                                                                                                                                                                                                                                                                                                                                                                                                                                                                                                                                                                                                                                                                                                                                                                                                                                                                                                                                                                                                                                                                                                                                                                                                                                                                                                                                                                                                                                  |
